# Supplementary material for: Cytosolic TaGAPC2 Enhances Tolerance to Drought Stress in Transgenic Arabidopsis Plants
Source: PubMed Central journal article supplement (PMC7590034; doi:10.3390/ijms21207499), 2020-10-12
Supplement: ijms-21-07499-s001.pdf [file ijms-21-07499-s001.pdf]

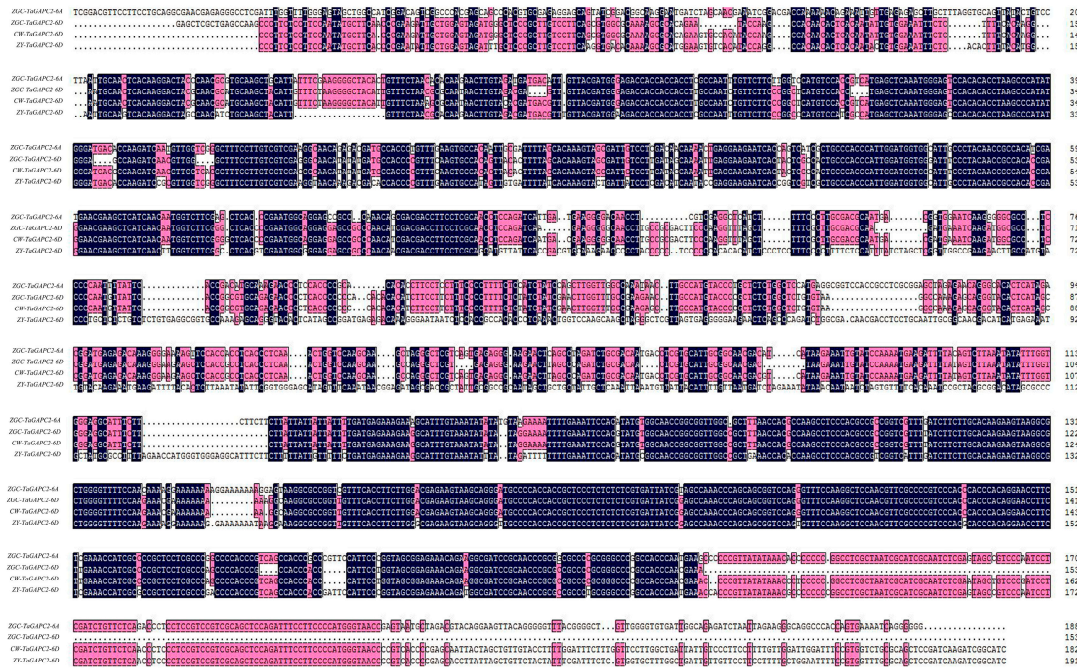

**Figure S3.** Promoter sequence alignment of *TaGAPC2* in wheat. *ZGC-TaGAPC2-6A*: The *TaGAPC2-6A* promoter in *Chinese spring* wheat; *ZGC-TaGAPC2-6D*: The *TaGAPC2-6D* promoter in *Chinese spring* wheat; *CW-TaGAPC2-6D*: The *TaGAPC2-6D* promoter in *Chang Wu* wheat; *ZY-TaGAPC2-6D*: The *TaGAPC2-6D* promoter in *Zheng Yin* wheat. The identical and 75% amino acid sequence similarity are separately indicated by mazarine and pink color.

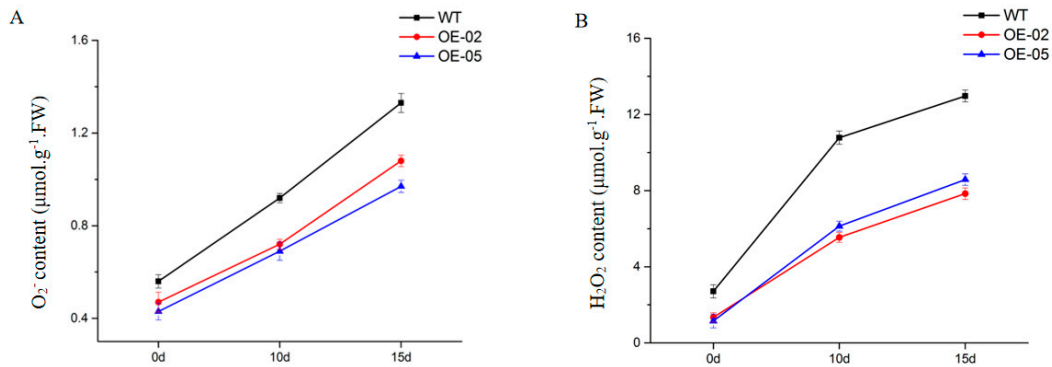

**Figure S4.** The contents of  $O_2$  (A) and  $H_2O_2$  (B) in WT and transgenic plants after drought stress. The data are representative of three independent experiments.

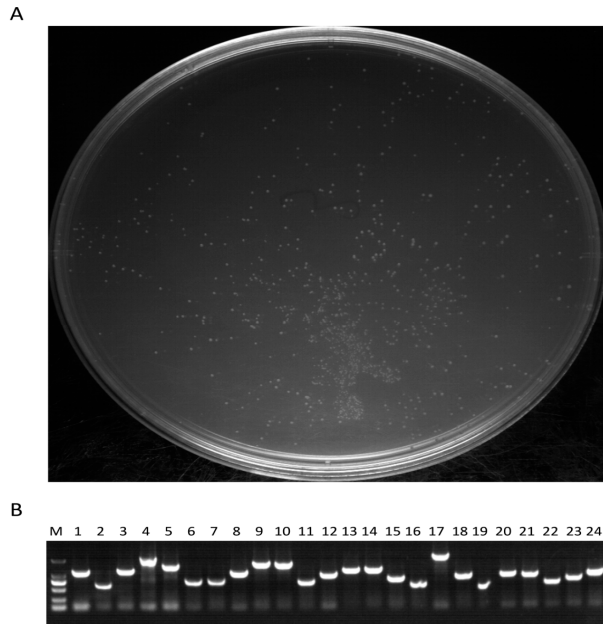

**Figure S5.** Quality of cDNA library (Yeast). (A) Measurement result of the library titer. (B) Detecting of the insert fragments.

**Table S1.** Putative cis-acting elements in the TaGAPC2 promoters.

| <b>Gene Element</b>           | <b>ABRE</b> | <b>CBFHV</b> | <b>DRE/CRT</b> | <b>GARE</b> | <b>LTRE</b> | <b>MYB</b> | <b>MYC</b> | <b>W-box</b> |
|-------------------------------|-------------|--------------|----------------|-------------|-------------|------------|------------|--------------|
| <i>TaGAPC2-6A</i><br>Promoter | 3           | 2            | 3              | 1           | 2           | 10         | 4          | 7            |
| <i>TaGAPC2-6D</i><br>Promoter | 3           | 4            | 2              | 1           | 3           | 10         | 8          | 10           |

**Table S2.** Basic local alignment search tool (BLAST) results for potential candidate interacting proteins with TaGAPC2-6D in cDNA wheat library.

| <b>Number</b> | <b>Name</b>                                                   | <b>GenBank</b> |
|---------------|---------------------------------------------------------------|----------------|
| 1             | Plastid glutamine synthetase 2                                | ACT22496.1     |
| 2             | Chromatin structure-remodeling complex protein BSH            | EMS62932.1     |
| 3             | Ribulose-1,5-bisphosphate carboxylase/oxygenase large subunit | AHI44627.1     |
| 4             | Hypothetical protein TRIUR3-14212                             | EMS50462       |
| 5             | Phospholipase D $\delta$                                      | AK334478.1     |
| 6             | Photosystem II 47 kDa protein                                 | NP_114283.1    |
| 7             | 26S protease regulatory subunit 7                             | OAY64297.1     |
| 8             | Hexokinase-2                                                  | AAX84838.1     |
| 9             | Cytochrome b6-f complex iron-sulfur subunit                   | Q7X9A6.1       |
| 10            | Glutamate receptor                                            | EMT00479.1     |

**Table 3.** All primers used in this experiment.

| <b>Primers for qRT-PCR</b> (The underline showed the restriction enzyme sites. F, forward; R, reverse) |                                                       |                                           |
|--------------------------------------------------------------------------------------------------------|-------------------------------------------------------|-------------------------------------------|
| Name                                                                                                   | Sequences(5' -3')                                     | Experiments                               |
| TaGAPC2-6A F/R                                                                                         | AATCGCATCGCAATCTCG/GCAGCGCAAAGCAAAAAT                 | qRT-PCR                                   |
| TaGAPC2-6B F/R                                                                                         | AAGTTTTGTATCAATCACCCGT/ATGTAGGTCATGTAGTCGGTGG         | qRT-PCR                                   |
| TaGAPC2-6D F/R                                                                                         | AATCGCATCGCAATCTCG/TGGTGATGAAGGGGTCGT                 | qRT-PCR                                   |
| <b>Primers for generating DNA vector</b>                                                               |                                                       |                                           |
| Name                                                                                                   | Sequences(5' -3')                                     | Experiments                               |
| PR-6A F                                                                                                | CTGCAGGTCGACGGATC <u>CCCGGG</u> CCTTCTCCTTCCAATATGCTT | TaGAPC2-6A promoter: transient expression |
| PR-6A R                                                                                                | GGTGGACTCCTTTAGAA <u>TTCC</u> GGGAAGGAAATCTGGAGCT     | TaGAPC2-6A promoter: transient expression |
| PR-6D F                                                                                                | CTGCAGGTCGACGGATC <u>CCCGGG</u> CCTTCCAATATGCTTCACCCG | TaGAPC2-6D promoter: transient expression |
| PR-6D R                                                                                                | GGTGGACTCCTTTAGAA <u>TTCC</u> AGGAAACGAACCCACGGAA     | TaGAPC2-6D promoter: transient expression |
| Ta1302-F                                                                                               | GGACTCTTG <u>ACCATG</u> ATGGCTCCGATCAAGATCG           | PCAMBIA1302, overexpression               |
| Ta1302-R                                                                                               | TCAGATCTA <u>CCATGG</u> CCTTGGTGCTGTGCATGTGA          | PCAMBIA1302, overexpression               |
| Pr1                                                                                                    | GGGGACTCTTGACCATG                                     | Detection of transgenic Arabidopsis       |
| Pr2                                                                                                    | TTACTAGTCAGATCTACCATGGC                               | Detection of transgenic Arabidopsis       |
| Pr3                                                                                                    | AGTTCATCCATGCCATGTGT                                  | Detection of transgenic Arabidopsis       |
